# Supplementary material for: A VgrG2b fragment cleaved by caspase-11/4 promotes Pseudomonas aeruginosa infection through suppressing the NLRP3 inflammasome
Source: eLife. 2025 Feb 25;13:RP99939. doi: 10.7554/eLife.99939 (PMC11856931; doi:10.7554/eLife.99939)
Supplement: Figure 1—source data 3. [file elife-99939-fig1-data3.xlsx]

## Sheet: Figure 1
	Figure 1B upper
	BMDM
	Mock	E.coli	Mock	PAO1
	0	1.1	0	1
	0	1	0	1
	0	1.1	0	0.9
	Figure 1B lower
	BMDM
	Mock	E.coli	Mock	PAO1
	0	1.8	0	1.3
	0	1.6	0	1.2
	0	1.5	0	1.6
	Figure 1C
	BMDM
	Mock	E.coli	Mock	PAO1
	81.9	1138.3	100.9	106.9
	76.2	1183.8	78.7	99.5
	72.1	1218	110	120.8
	Figure 1D
	BMDM
	Mock	E.coli	Mock	PAO1
	7.1	72	4.5	71.5
	6.2	54	3.9	70.8
	5.9	87.8	5.1	61.5
	Figure 1E
	BMDM
	Mock	E.coli	Mock	PAO1
	77.6	4.3	64	4.8
	58.2	3.3	74.2	4.9
	74.4	5.1	52.5	4.5
	Figure 1H
	Aim2–/– BMDM
	Mock	LPS+PAO1	LPS+mito.DNA	LPS+mito.DNA+PAO1
	74.6	86.5	1208.9	80.5
	92.5	96.9	1257.3	82.9
	61.9	84.8	1136.4	77.3
	Figure 1I
	Aim2–/– BMDM
	Mock	LPS+PAO1	LPS+mito.DNA	LPS+mito.DNA+PAO1
	6.6	74.6	65.9	75.6
	7.7	70.8	75.2	58.2
	5.3	78.3	77.8	72.6
	Figure 1J
	Aim2–/– BMDM
	Mock	LPS+PAO1	LPS+mito.DNA	LPS+mito.DNA+PAO1
	71.5	4.9	2.6	5.3
	79.4	4.9	2	6.2
	58.7	5.4	2.5	6.3
	Figure 1L
	Casp11–/–;Aim2–/– BMDM
	Mock	LPS+PAO1	LPS+mito.DNA	LPS+mito.DNA+PAO1
	87.3	65.2	1255.1	1211.4
	80.3	70.5	1029.2	1041.8
	108.2	74.4	1104.5	1344.6
	Figure 1M
	Casp11–/–;Aim2–/– BMDM
	Mock	LPS+PAO1	LPS+mito.DNA	LPS+mito.DNA+PAO1
	6.9	5.3	80.6	76.1
	8.5	6	97.5	91.4
	6.1	5.8	79.8	62.4
	Figure 1N
	Casp11–/–;Aim2–/– BMDM
	Mock	LPS+PAO1	LPS+mito.DNA	LPS+mito.DNA+PAO1
	67.3	77	21.6	21.2
	84.1	92.4	18.3	24.1
	82.1	69.3	24.4	23.9

## Sheet: Figure 1-figure supplement 1
	Figure 1-figure supplement 1B upper
	human Mac.
	Mock	E.coli	Mock	PAO1
	0	1.6	0	1.3
	0	1.4	0	1.1
	0	1.6	0	1.4
	Figure 1-figure supplement 1B lower
	human Mac.
	Mock	E.coli	Mock	PAO1
	0	1.4	0	1.4
	0	1.5	0	1.1
	0	1.4	0	1.3
	Figure 1-figure supplement 1C
	human Mac.
	Mock	E.coli	Mock	PAO1
	96.2	1180.2	77.6	96.6
	104.9	1251	85.4	93.7
	77	1097.6	92.4	105.3
	Figure 1-figure supplement 1D
	human Mac.
	Mock	E.coli	Mock	PAO1
	4.4	62.9	4.7	66.9
	4.1	77.4	5.1	52.2
	4.3	74.9	4.4	74.3
	Figure 1-figure supplement 1E
	human Mac.
	Mock	E.coli	Mock	PAO1
	67	5.1	63.2	5.7
	66.7	5.5	51.2	4.7
	65.6	4.2	73.3	5
	Figure 1-figure supplement 1J
	Gsdmd–/–;Aim2–/– BMDM
	Mock	LPS+PAO1	LPS+mito.DNA	LPS+mito.DNA+PAO1
	70	92.2	61.4	104.3
	71.4	109.7	52.2	96
	66.5	71	51.6	126.2
	Figure 1-figure supplement 1K
	Gsdmd–/–;Aim2–/– BMDM
	Mock	LPS+PAO1	LPS+mito.DNA	LPS+mito.DNA+PAO1
	3.3	5	7.9	2.9
	3.3	4.5	8.2	3.6
	2.8	3.8	7	3.6
	Figure 1-figure supplement 1L
	Gsdmd–/–;Aim2–/– BMDM
	Mock	LPS+PAO1	LPS+mito.DNA	LPS+mito.DNA+PAO1
	65.9	80.4	61.1	66
	55.4	68.3	45.8	68.6
	49.4	90.9	44.3	62
