# Supplementary material for: A VgrG2b fragment cleaved by caspase-11/4 promotes Pseudomonas aeruginosa infection through suppressing the NLRP3 inflammasome
Source: eLife. 2025 Feb 25;13:RP99939. doi: 10.7554/eLife.99939 (PMC11856931; doi:10.7554/eLife.99939)
Supplement: Figure 2—source data 3. [file elife-99939-fig2-data3.xlsx]

## Sheet: Figure 2
	Figure 2K
	BMDM
	Mock	KI	Mock	KO
	94.8225	79.3925	90.995	1397.18
	111.891	61.9261	93.7249	1704.57
	75.858	95.271	102.824	1676.62
	Figure 2L
	BMDM
	Mock	KI	Mock	KO
	3.925	70.075	3.8	63.15
	3.02225	78.484	4.522	73.254
	3.3755	60.9652	4.066	72.6225
	Figure 2M
	BMDM
	Mock	KI	Mock	KO
	64	6.6	59.1	4
	73	6.8	47.9	5
	53.8	5	63.8	4.3

## Sheet: Figure 2-figure supplement 1
	Figure 2-figure supplement 1M upper
	BMDM
	Mock	KI	Mock	KO
	0	0.7	0	0.9
	0	0.7	0	0.8
	0	0.9	0	0.9
	Figure 2-figure supplement 1M lower
	BMDM
	Mock	KI	Mock	KO
	0	1	0	0.9
	0	0.9	0	1
	0	1.1	0	0.9
