# Supplementary material for: A VgrG2b fragment cleaved by caspase-11/4 promotes Pseudomonas aeruginosa infection through suppressing the NLRP3 inflammasome
Source: eLife. 2025 Feb 25;13:RP99939. doi: 10.7554/eLife.99939 (PMC11856931; doi:10.7554/eLife.99939)
Supplement: Figure 3—source data 3. [file elife-99939-fig3-data3.xlsx]

## Sheet: Figure 3
	Figure 3I upper
	BMDM
	Mock	KI	D883A
	0	0.9	0.9
	0	0.8	1
	0	0.9	0.8
	Figure 3I lower
	BMDM
	Mock	KI	D883A
	0	1.5	1.5
	0	1.4	1.6
	0	1.9	1.3
	Figure 3J
	BMDM
	Mock	KI	D883A
	79	90.9	1142.9
	73.5	108.2	857.2
	98.8	94.6	1337.2
	Figure 3K
	BMDM
	Mock	KI	D883A
	5.7	69.1	61.4
	7	78.7	71.8
	5.5	85.6	47.9
	Figure 3L
	BMDM
	Mock	KI	D883A
	68.5	6.5	4.9
	52.8	6.8	3.8
	76.7	5.9	5.6

## Sheet: Figure 3-figure supplement 1
	Figure 3-figure supplement 1H upper
	human Mac.
	Mock	KI	D883A
	0	2.2	2.5
	0	2.4	2.9
	0	2.3	2.4
	Figure 3-figure supplement 1H lower
	human Mac.
	Mock	KI	D883A
	0	3.3	3.6
	0	3	4
	0	3.6	2.9
	Figure 3-figure supplement 1I
	human Mac.
	Mock	KI	D883A
	79.6	76.2	1168.5
	82.8	95.2	1238.6
	74	62.5	1040
	Figure 3-figure supplement 1J
	human Mac.
	Mock	KI	D883A
	4.3	66	71
	4.2	59.4	73.8
	5.2	49.5	65.3
	Figure 3-figure supplement 1K
	human Mac.
	Mock	KI	D883A
	69.8	5.9	5.6
	78.2	5.3	6.8
	65.6	6.3	4.6
