# Supplementary material for: A VgrG2b fragment cleaved by caspase-11/4 promotes Pseudomonas aeruginosa infection through suppressing the NLRP3 inflammasome
Source: eLife. 2025 Feb 25;13:RP99939. doi: 10.7554/eLife.99939 (PMC11856931; doi:10.7554/eLife.99939)
Supplement: Figure 4—source data 3. [file elife-99939-fig4-data3.xlsx]

## Sheet: Figure 4
	Figure 4A
	NLRP3	NLRP6	NLRC4
	11.9	6.6	1.5
	7	1.2	3.4
	7.8	6.4
	13
	11.7
	8.5
	9.2
	13
	12
