# Supplementary material for: A VgrG2b fragment cleaved by caspase-11/4 promotes Pseudomonas aeruginosa infection through suppressing the NLRP3 inflammasome
Source: eLife. 2025 Feb 25;13:RP99939. doi: 10.7554/eLife.99939 (PMC11856931; doi:10.7554/eLife.99939)
Supplement: Figure 5—source data 3. [file elife-99939-fig5-data3.xlsx]

## Sheet: Figure 5
	Figure 5D upper
	BMDM
	Mock	LPS	LPS+VgrG2b-C
	0	1	0.8
	0	1	0.9
	0	0.8	0.9
	Figure 5D lower
	BMDM
	Mock	LPS	LPS+VgrG2b-C
	0	2.2	1.7
	0	2.2	2
	0	1.8	1.9
	Figure 5E
	BMDM
	Mock	LPS	LPS+VgrG2b-C
	95.9	1153.8	79.9
	99.8	1049.9	74.3
	116.1	1026.8	75.4
	Figure 5F
	BMDM
	Mock	LPS	LPS+VgrG2b-C
	7.5	64.6	74
	7.2	54.2	79.2
	6.7	55.5	57.7
	Figure 5G
	BMDM
	Mock	LPS	LPS+VgrG2b-C
	70.4	4.5	4.5
	64	5.5	3.8
	52.8	4.1	5

## Sheet: Figure 5-figure supplement 1
	Figure 5-figure supplement 1D
	BMDM
	Mock	LPS+Nig	LPS+Nig+VgrG2b-C
	99.4	1351	68.7
	110.3	1459.1	67.3
	99.4	1121.3	63.8
	Figure 5-figure supplement 1E
	BMDM
	Mock	LPS+Nig	LPS+Nig+VgrG2b-C
	3.7	76.7	5.9
	4.3	69.8	5.3
	2.8	70.9	6
	Figure 5-figure supplement 1F
	BMDM
	Mock	LPS+Nig	LPS+Nig+VgrG2b-C
	78.5	5.9	62.2
	76.2	4.4	73.4
	91.9	5	68.4
	Figure 5-figure supplement 1G
	Mock	VgrG2b-C
	1	1.2
	0.8	0.9
	0.8	1.1
	1	0.9
	Figure 5-figure supplement 1H
	Mock	VgrG2b-C
	1	0.9
	1.2	1.1
	1.1	1
	1.1	1.1
