# Supplementary material for: A VgrG2b fragment cleaved by caspase-11/4 promotes Pseudomonas aeruginosa infection through suppressing the NLRP3 inflammasome
Source: eLife. 2025 Feb 25;13:RP99939. doi: 10.7554/eLife.99939 (PMC11856931; doi:10.7554/eLife.99939)
Supplement: Figure 6—source data 3. [file elife-99939-fig6-data3.xlsx]

## Sheet: Figure 6
	Figure 6A
	Day	KI	D883A
	1	1
	1	1
	2	1
	2	1
	2	1
	2	1
	5	1
	5	1
	5		1
	5		1
	7		0
	7		0
	7		0
	7		0
	7		0
	7		0
	7		0
	Figure 6B
	KI	D883A
	1376	2265
	1145	1660
	1338	1545
	1531	1779
	1051	1773
	Figure 6C
	KI	D883A
	864	1070
	1023	809
	1028	752
	535	1074
	713	513
	Figure 6D
	KI	D883A
	616	399
	720	598
	330	478
	483	352
	638	353
	Figure 6E
	KI	D883A
	243568	32095
	756011	33871
	233935	73399
	484511	43555
	833645	4530
	Figure 6G
	KI	D883A
	22.9	40.3
	29.2	15.7
	16.8	29.2
	17.5	41.2
	23.2	53.4
	Figure 6H
	KI	D883A
	1229	1402
	666	1792
	989	1470
	831	1717
	865	1547
	Figure 6I
	KI	D883A
	1068	985
	756	586
	1054	640
	516	665
	563	739
	Figure 6J
	KI	D883A
	603	560
	436	774
	324	458
	667	676
	739	463
	Figure 6K
	Day	Mock	TAT
	2	1
	2	1
	2	1
	3	1
	3	1
	3	1
	3	1
	4	1
	3		1
	6		1
	7		1
	7		0
	7		0
	7		0
	7		0
	7		0
	7		0
	Figure 6L
	Mock	TAT
	1033	1690
	1191	1673
	1437	2352
	862	2272
	1236	1587
	Figure 6M
	Mock	TAT
	791	956
	997	541
	534	1001
	748	958
	500	961
	Figure 6N
	Mock	TAT
	628	331
	658	728
	756	736
	320	358
	447	715
	Figure 6O
	Mock	TAT
	317511	72855
	128448	14716
	312137	24409
	507027	9590
	826135	15671

## Sheet: Figure 6-figure supplement 1
	Figure 6-figure supplement 1C
	BMDM
	Mock	TAT
	85.5	1366.4
	104.3	1049.7
	82.9	1038.5
	Figure 6-figure supplement 1D
	BMDM
	Mock	TAT
	69.9	78.2
	52.4	60.2
	76.2	71.9
	Figure 6-figure supplement 1E
	BMDM
	Mock	TAT
	3.8	5
	4.1	6
	3.8	3.8
	Figure 6-figure supplement 1G
	human Mac.
	Mock	TAT
	92.9	1147.6
	113.3	1342.7
	99.4	1377.1
	Figure 6-figure supplement 1H
	human Mac.
	Mock	TAT
	68.4	64.9
	78	76.6
	54.7	77.9
	Figure 6-figure supplement 1I
	human Mac.
	Mock	TAT
	4.4	2.7
	3.5	3
	3.8	3.3
